# Supplementary material for: Dyslipidemia in rural areas of North China: prevalence, characteristics, and predictive value
Source: PubMed Central journal article supplement (PMC5020547; doi:10.1186/s12944-016-0328-y), 2016-09-13
Supplement: 12944_2016_328_MOESM1_ESM.pdf [file 12944_2016_328_MOESM1_ESM.pdf]

## SUPPLEMENTAL MATERIAL

**Table S1.** ATP III classification of total, LDL, HDL cholesterol and triglycerides (mmol/L).

| Total cholesterol |                       | HDL cholesterol |                 |
|-------------------|-----------------------|-----------------|-----------------|
| < 5.18            | Desirable             | <1.04           | Low             |
| 5.18-6.21         | Borderline high       | 1.04-1.54       | Borderline high |
| ≥6.22             | High                  | ≥1.55           | High            |
| LDL cholesterol   |                       | Triglycerides   |                 |
| < 2.59            | Optimal               | <1.70           | Normal          |
| 2.59-3.36         | Near or above optimal | 1.70-2.25       | Borderline high |
| 3.37-4.13         | Borderline high       | 2.26-5.63       | High            |
| 4.14-4.91         | High                  | ≥5.64           | Very high       |
| ≥4.92             | Very high             |                 |                 |

LDL, low density lipoprotein; HDL, high density lipoprotein.

**Table S2.** Mean (95% Confidence Interval) of serum total cholesterol, HDL cholesterol, LDL cholesterol, and triglyceride levels in the overall participants.

|                        | Total cholesterol | LDL cholesterol  | HDL cholesterol  | Triglycerides    |
|------------------------|-------------------|------------------|------------------|------------------|
| Total                  | 5.34 (5.32,5.36)  | 3.04 (3.02,3.06) | 1.38 (1.37,1.39) | 1.48 (1.45,1.51) |
| Gender                 |                   |                  |                  |                  |
| male                   | 5.35 (5.31,5.39)  | 3.08 (3.05,3.11) | 1.32 (1.30,1.33) | 1.68 (1.63,1.74) |
| female                 | 5.33 (5.30,5.36)  | 3.01 (2.98,3.03) | 1.42 (1.42,1.43) | 1.34 (1.32,1.37) |
| <i>P</i> value         | 0.374             | <0.001           | <0.001           | <0.001           |
| Age,ys                 |                   |                  |                  |                  |
| 18-39                  | 4.77 (4.72,4.82)  | 2.51 (2.47,2.54) | 1.24 (1.23,1.26) | 1.32 (1.25,1.38) |
| 40-49                  | 5.21 (5.16,5.25)  | 2.91 (2.88,2.95) | 1.35 (1.33,1.36) | 1.59 (1.51,1.68) |
| 50-59                  | 5.53 (5.48,5.57)  | 3.21 (3.18,3.24) | 1.41 (1.4,1.43)  | 1.58 (1.52,1.63) |
| 60-69                  | 5.61 (5.57,5.66)  | 3.30 (3.27,3.34) | 1.45 (1.44,1.47) | 1.43 (1.39,1.48) |
| ≥70                    | 5.5 (5.42,5.59)   | 3.20 (3.13,3.27) | 1.46 (1.43,1.48) | 1.36 (1.30,1.43) |
| <i>P</i> value         | <0.001            | <0.001           | <0.001           | <0.001           |
| FPG, mmol/L            |                   |                  |                  |                  |
| <5.6                   | 5.14 (5.1,5.17)   | 2.86 (2.83,2.88) | 1.39 (1.38,1.40) | 1.27 (1.24,1.31) |
| 5.6-6.9                | 5.48 (5.44,5.51)  | 3.18 (3.15,3.21) | 1.39 (1.38,1.40) | 1.54 (1.49,1.58) |
| ≥7.0                   | 5.68 (5.62,5.75)  | 3.31 (3.26,3.36) | 1.34 (1.32,1.35) | 2.03 (1.92,2.14) |
| <i>P</i> value         | <0.001            | <0.001           | <0.001           | <0.001           |
| BMI, kg/m <sup>2</sup> |                   |                  |                  |                  |
| ≤23.9                  | 5.22 (5.18,5.26)  | 2.88 (2.85,2.91) | 1.51 (1.50,1.52) | 1.11 (1.08,1.14) |
| 24.0-27.9              | 5.38 (5.35,5.41)  | 3.10 (3.07,3.13) | 1.34 (1.33,1.35) | 1.56 (1.52,1.61) |
| ≥28                    | 5.43 (5.39,5.48)  | 3.16 (3.13,3.20) | 1.26 (1.25,1.27) | 1.86 (1.79,1.93) |
| <i>P</i> value         | <0.001            | <0.001           | <0.001           | <0.001           |

FPG, fasting plasma glucose; BMI, kg/m<sup>2</sup>; LDL, low density lipoprotein; HDL, high density lipoprotein.

**Table S3.** The proportions (95% Confidence Interval) of four dyslipidemia phenotypes according to gender, age, BMI and fasting glucose.

|                        | Isolated<br>hypercholesterolemia | Isolated<br>hypertriglyceridemia | Mixed<br>dyslipidemia | Low HDL level<br>alone |
|------------------------|----------------------------------|----------------------------------|-----------------------|------------------------|
| Total                  | 11.0 (10.3,11.7)                 | 10.6 (9.9,11.2)                  | 13.8 (13.1,14.5)      | 5.9 (5.4,6.3)          |
| Gender                 |                                  |                                  |                       |                        |
| male                   | 9.6 (8.6,10.6)                   | 10.9 (9.8,11.9)                  | 17.8 (16.6,19.1)      | 8.6 (7.7,9.6)          |
| female                 | 11.9 (11.1,12.8)                 | 10.4 (9.6,11.2)                  | 11.1 (10.2,12.0)      | 4 (3.5,4.6)            |
| <i>P</i> value         | 0.001                            | 0.482                            | <0.001                | <0.001                 |
| Age,ys                 |                                  |                                  |                       |                        |
| 18-39                  | 3.6 (2.7,4.5)                    | 5.5 (4.4,6.6)                    | 12.8 (11.1,14.4)      | 12.3 (10.7,13.9)       |
| 40-49                  | 7.4 (6.1,8.6)                    | 13.1 (11.5,14.7)                 | 13.7 (12.0,15.3)      | 6.1 (5,7.3)            |
| 50-59                  | 12.4 (11.1,13.7)                 | 12.9 (11.5,14.2)                 | 15.2 (13.7,16.6)      | 4 (3.2,4.7)            |
| 60-69                  | 17.2 (15.7,18.8)                 | 9.8 (8.5,11.0)                   | 13.6 (12.1,15.0)      | 3.7 (2.9,4.5)          |
| ≥70                    | 13 (10.3,15.8)                   | 11.5 (8.9,14.1)                  | 12.2 (9.5,14.8)       | 2.9 (1.6,4.3)          |
| <i>P</i> value         | <0.001                           | <0.001                           | 0.148                 | <0.001                 |
| FPG,mmol/l             |                                  |                                  |                       |                        |
| <5.6                   | 9.2 (8.3,10.1)                   | 8 (7.2,8.8)                      | 9.6 (8.7,10.5)        | 7 (6.2,7.7)            |
| 5.6-6.9                | 12.7 (11.5,13.8)                 | 11.9 (10.7,13)                   | 15.1 (13.8,16.4)      | 5 (4.2,5.8)            |
| ≥7.0                   | 13.2 (11.3,15)                   | 16.2 (14.2,18.3)                 | 24.5 (22.1,26.9)      | 4.3 (3.1,5.4)          |
| <i>P</i> value         | <0.001                           | <0.001                           | <0.001                | <0.001                 |
| BMI, kg/m <sup>2</sup> |                                  |                                  |                       |                        |
| ≤23.9                  | 12.9 (11.7,14.2)                 | 5.4 (4.6,6.2)                    | 6.0 (5.1,6.8)         | 3.8 (3.1,4.5)          |
| 24.0-27.9              | 10.3 (9.3,11.3)                  | 11.9 (10.8,13.0)                 | 15.3 (14.1,16.5)      | 6.1 (5.3,6.9)          |
| ≥28                    | 9.4 (8.1,10.6)                   | 15.7 (14.1,17.2)                 | 22.3 (20.5,24.1)      | 8.3 (7.1,9.5)          |
| <i>P</i> value         | 0.001                            | <0.001                           | <0.001                | <0.001                 |

FPG, fasting plasma glucose; BMI, kg/m<sup>2</sup>; LDL, low density lipoprotein; HDL, high density lipoprotein. Isolated hypertriglyceridemia: TG≥1.7mmol/L and TC<6.22 mmol/L and LDL-C<4.14mmol/L and HDL>1.04mmol/L; isolated hypercholesterolemia: TC≥6.2/LDL-C≥4.14 and triglycerides<1.7 mmol/L and HDL>1.04mmol/L; mixed hyperlipidemia: triglycerides≥1.7 mmol/L and TC≥6.2 mmol/L/ LDL-C≥4.14mmol/L; isolated low HDL-C: HDL-C≤1.04 mmol/L without hypertriglyceridemia nor hypercholesterolemia.

**Table S4.** Multivariable Analyses of the Risk for Development of Lipid-related Diseases in Subjects with Different Dyslipidemia Phenotypes.

|                        | Multivariable Model 1                |        | Multivariable Model 2   |        |                          | Multivariable Model 1   |        | Multivariable Model 2   |        |
|------------------------|--------------------------------------|--------|-------------------------|--------|--------------------------|-------------------------|--------|-------------------------|--------|
|                        | OR/Coefficient <sup>#</sup> (95% CI) | P      | OR/Coefficient*(95% CI) | P      |                          | OR/Coefficient*(95% CI) | P      | OR/Coefficient*(95% CI) | P      |
| <b>Atherosclerosis</b> |                                      |        |                         |        | <b>Diabetes Mellitus</b> |                         |        |                         |        |
| Dyslipiemia            |                                      | <0.001 |                         | <0.001 | Dyslipiemia              |                         | <0.001 |                         | <0.001 |
| Type 1                 | 1.43 (1.21,1.69)                     | <0.001 | 1.37 (1.16,1.61)        | <0.001 | Type 1                   | 1.32 (1.13,1.55)        | 0.001  | 1.25 (1.06,1.47)        | 0.009  |
| Type 2                 | 1.33 (1.11,1.59)                     | 0.002  | 1.27 (1.05,1.53)        | 0.012  | Type 2                   | 2.41 (2.06,2.81)        | <0.001 | 1.71 (1.45,2.01)        | <0.001 |
| Type 3                 | 0.84 (0.63,1.12)                     | 0.227  | 0.84 (0.63,1.13)        | 0.249  | Type 3                   | 1.45 (1.15,1.84)        | 0.002  | 1.23 (0.97,1.57)        | 0.087  |
| Type 4                 | 1.54 (1.27,1.86)                     | <0.001 | 1.47 (1.20,1.80)        | <0.001 | Type 4                   | 2.88 (2.43,3.41)        | <0.001 | 1.92 (1.60,2.31)        | <0.001 |
| Type 5                 | 0.98 (0.75,1.28)                     | 0.861  | 0.97 (0.73,1.27)        | 0.810  | Type 5                   | 2.10 (1.70,2.60)        | <0.001 | 1.40 (1.12,1.76)        | 0.004  |
| CIMT/(1-SD TC)         | 0.038 (0.017,0.060 )                 | <0.001 | 0.038 (0.016,0.060 )    | 0.001  | FPG/(1-SD TC)            | 0.132 (0.110,0.153 )    | <0.001 | 0.103 (0.082,0.124 )    | <0.001 |
| CIMT/(1-SD LDL-C)      | 0.047 (0.025,0.068 )                 | <0.001 | 0.048 (0.026,0.070 )    | <0.001 | FPG/(1-SD LDL-C)         | 0.121 (0.099,0.143 )    | <0.001 | 0.084 (0.062,0.105 )    | <0.001 |
| CIMT/(1-SD TG)         | -0.005(-0.026,0.015)                 | 0.621  | -0.014 (-0.036,0.009 )  | 0.242  | FPG/(1-SD TG)            | 0.187 (0.166,0.207 )    | <0.001 | 0.148 (0.126,0.170 )    | <0.001 |
| <b>NAFLD</b>           |                                      |        |                         |        | <b>Hyperuricemia</b>     |                         |        |                         |        |
| Dyslipiemia            |                                      | <0.001 |                         | <0.001 | Dyslipiemia              |                         | <0.001 |                         | <0.001 |
| Type 1                 | 1.17 (0.98,1.40)                     | 0.090  | 1.10 (0.89,1.35)        | 0.396  | Type 1                   | 1.74 (1.46,2.08)        | <0.001 | 1.57 (1.30,1.88)        | <0.001 |
| Type 2                 | 3.08 (2.63,3.60)                     | <0.001 | 2.37 (1.95,2.89)        | <0.001 | Type 2                   | 2.69 (2.28,3.18)        | <0.001 | 1.69 (1.42,2.03)        | <0.001 |
| Type 3                 | 2.68 (2.16,3.31)                     | <0.001 | 1.91 (1.48,2.47)        | <0.001 | Type 3                   | 1.74 (1.37,2.20)        | <0.001 | 1.55 (1.21,1.99)        | 0.001  |
| Type 4                 | 3.41 (2.85,4.06)                     | <0.001 | 2.44 (1.95,3.05)        | <0.001 | Type 4                   | 3.04 (2.54,3.64)        | <0.001 | 1.70 (1.39,2.08)        | <0.001 |
| Type 5                 | 4.57 (3.73,5.59)                     | <0.001 | 3.30 (2.54,4.28)        | <0.001 | Type 5                   | 3.16 (2.57,3.89)        | <0.001 | 1.99 (1.59,2.50)        | <0.001 |
| ALT/(1-SD TG)          | 0.171 (0.150,0.191)                  | <0.001 | 0.144 (0.122,0.165)     | <0.001 | UA/(1-SD TC)             | 0.117 (0.097,0.136 )    | <0.001 | 0.051 (0.032,0.069 )    | <0.001 |
| AST/(1-SD TG)          | 0.082 (0.060,0.103)                  | <0.001 | 0.084 (0.062,0.107)     | <0.001 | UA/(1-SD LDL-C)          | 0.125 (0.105,0.145 )    | <0.001 | 0.061 (0.042,0.079 )    | <0.001 |
| ALT/(1-SD HDL-C)       | -0.078 (-0.099,-0.056)               | <0.001 | -0.033 (-0.056,-0.010)  | 0.004  | UA/(1-SD HDL-C)          | -0.161(-0.180,-0.141 )  | <0.001 | -0.092(-0.111,-0.073 )  | <0.001 |
| AST/(1-SD HDL-C)       | 0.013 (-0.009,0.035)                 | 0.254  | 0.023 (0.000,0.046)     | 0.050  | UA/(1-SD TG)             | 0.192 (0.173,0.211 )    | <0.001 | 0.086 (0.067,0.104 )    | <0.001 |

Type-1, isolated hypercholesterolemia; Type-2, isolated hypertriglyceridemia; Type-3, low HDL-C level alone; Type-4, high TC/LDL-C+high TG; Type-5, high TG + low HDL-C; OR, odds ratio; CI, confidence interval; SD, standard deviation; CIMT, carotid intima media thickness; TC, total cholesterol; LDL-C, low density lipoprotein cholesterol; TG, triglyceridemia; HDL-C, high density lipoprotein cholesterol; FPG, fasting plasma glucose; UA, uric acids.

The multivariable model 1 was adjusted for age, sex. The multivariable model 2 was adjusted for age, sex, body mass index, smoking status, drinking status, liver function, hypertension, hyperuricemia, diabetes mellitus, NAFLD and atherosclerosis.

<sup>#</sup>Coefficients of linear correlation were estimated between lipid parameters and the value of CIMT, FPG, ALT/AST and serum uric acid.
